# Supplementary material for: The age pattern of the male-to-female ratio in mortality from COVID-19 mirrors that of cardiovascular disease in the general population
Source: PubMed Central journal article supplement (PMC7906174; doi:10.18632/aging.202639), 2021-02-07
Supplement: aging-13-202639-s001.pdf [file aging-13-202639-s001.pdf]

**SUPPLEMENTARY FIGURES**

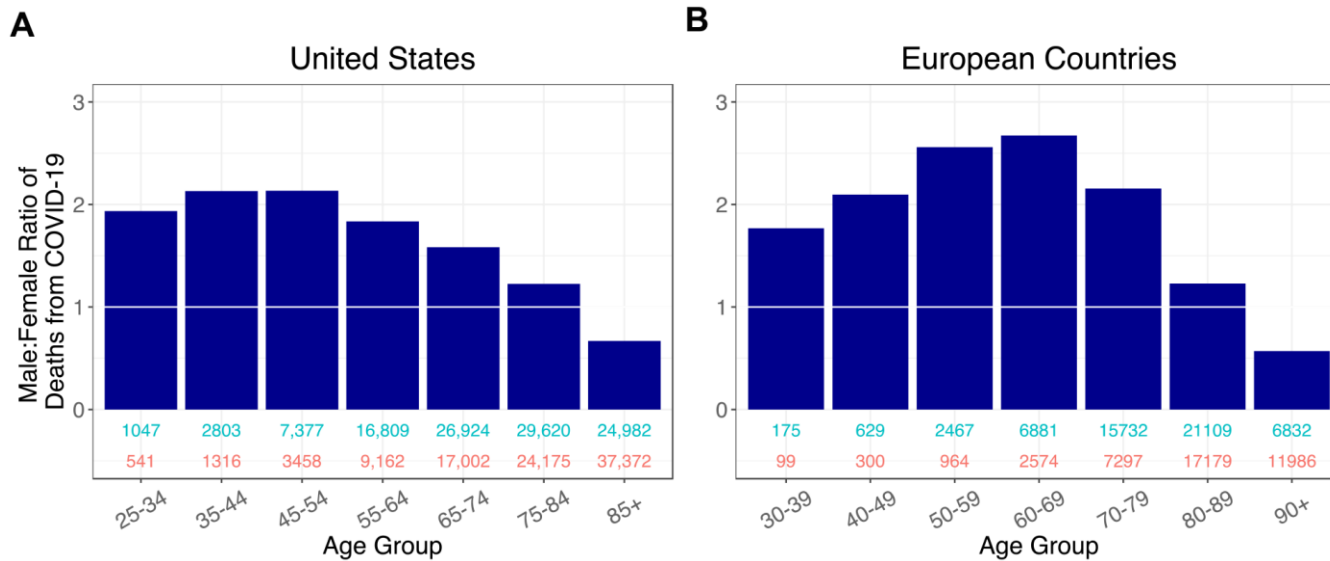

**Supplementary Figure 1.** Ratios of male to female deaths from COVID-19 (raw data) for the (A) United States, and (B) combined ratios for five European countries: Italy, France, Spain, Germany, and the Netherlands. A 1:1 ratio is indicated by white markers. Numbers below plots indicate number of male deaths (turquoise) and female deaths (orange).

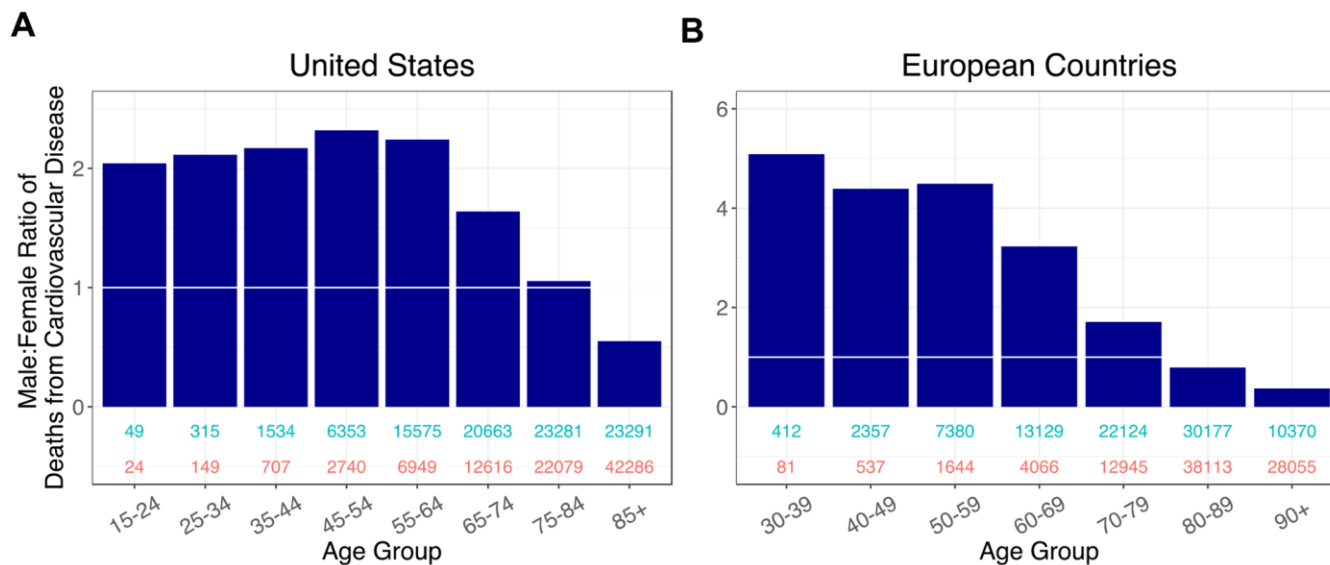

**Supplementary Figure 2.** Ratios of male to female deaths from cardiovascular disease (raw data) for the (A) United States, and (B) combined ratios for five European countries: Italy, France, Spain, Germany, and the Netherlands. A 1:1 ratio is indicated by white markers. Numbers below plots indicate number of male deaths (turquoise) and female deaths (orange). Note that y-axes have different scales.

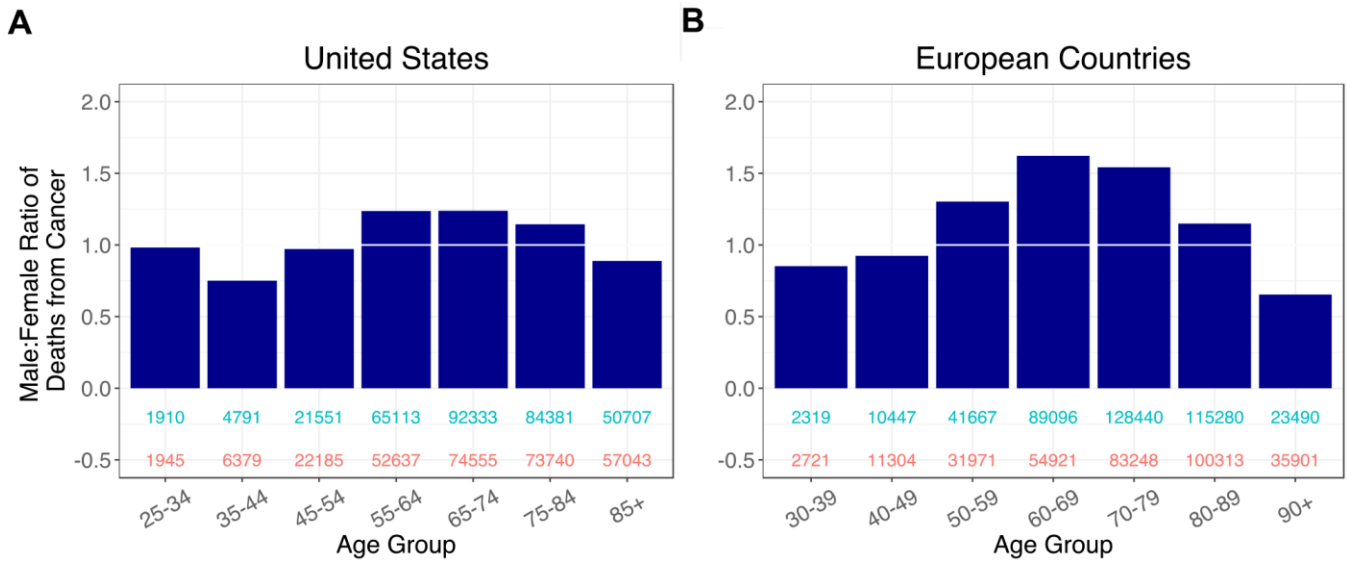

**Supplementary Figure 3.** Ratios of male to female deaths from cancer (raw data) for the (A) United States, and (B) combined ratios for five European countries: Italy, France, Spain, Germany, and the Netherlands. A 1:1 ratio is indicated by white markers. Numbers below plots indicate number of male deaths (turquoise) and female deaths (orange).

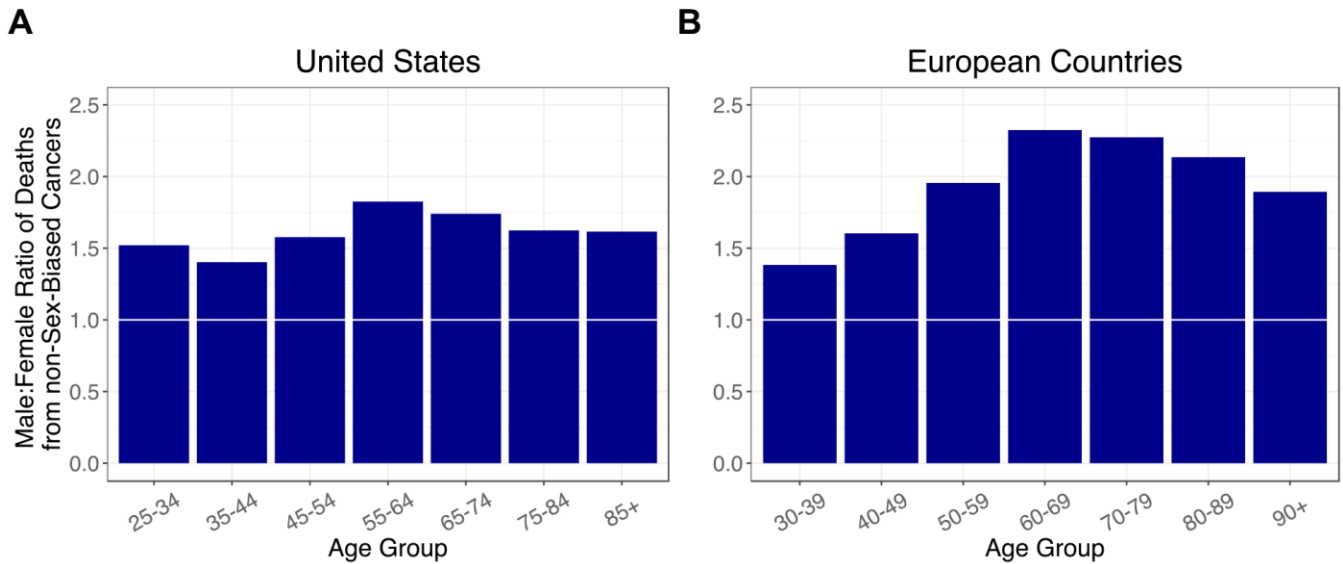

**Supplementary Figure 4.** Ratios of male to female deaths from non-sex-biased cancers (adjusted for population sex distribution) for the (A) United States, and (B) combined ratios for five European countries: Italy, France, Spain, Germany, and the Netherlands. A 1:1 ratio is indicated by white markers.
