# Supplementary material for: The age pattern of the male-to-female ratio in mortality from COVID-19 mirrors that of cardiovascular disease in the general population
Source: PubMed Central journal article supplement (PMC7906174; doi:10.18632/aging.202639), 2021-02-07
Supplement: aging-13-202639-s002.pdf [file aging-13-202639-s002.pdf]

## SUPPLEMENTARY TABLES

**Supplementary Table 1. Sources for COVID-19 deaths data.**

| Country       | Website                                                                     | Date updated | Date accessed |
|---------------|-----------------------------------------------------------------------------|--------------|---------------|
| United States | <a href="https://data.cdc.gov/">https://data.cdc.gov/</a>                   | Oct 10 2020  | Oct 14 2020   |
| Italy         | <a href="https://www.epicentro.iss.it/">https://www.epicentro.iss.it/</a>   | Oct 4 2020   | Oct 14 2020   |
| France        | <a href="https://dc-covid.site.ined.fr/">https://dc-covid.site.ined.fr/</a> | Oct 8 2020   | Oct 14 2020   |
| Spain         | <a href="https://www.mscbs.gob.es/">https://www.mscbs.gob.es/</a>           | May 22 2020  | Oct 14 2020   |
| Germany       | <a href="https://www.rki.de/">https://www.rki.de/</a>                       | Oct 13 2020  | Oct 14 2020   |
| Netherlands   | <a href="https://www.rivm.nl/">https://www.rivm.nl/</a>                     | Oct 13 2020  | Oct 14 2020   |

**Supplementary Table 2. Raw data for COVID-19 deaths stratified by age and sex.**

|  | United States |       |        | Italy | France    |       |         | Spain | Germany   |      |        | Netherlands |
|--|---------------|-------|--------|-------|-----------|-------|---------|-------|-----------|------|--------|-------------|
|  | Age group     | Male  | Female |       | Age group | Males | Females |       | Age group | Male | Female |             |
|  | 0-4           | 22    | 15     |       | 0-9       | 1     | 3       |       | 0-9       | 0    | 1      |             |
|  | 5-14          | 24    | 13     |       | 10-19     | 0     | 0       |       | 10-19     | 1    | 0      |             |
|  | 15-24         | 230   | 144    |       | 20-29     | 12    | 3       |       | 20-29     | 8    | 3      |             |
|  | 25-34         | 1047  | 541    |       | 30-39     | 46    | 24      |       | 30-39     | 18   | 8      |             |
|  | 35-44         | 2803  | 1316   |       | 40-49     | 229   | 89      |       | 40-49     | 60   | 24     |             |
|  | 45-54         | 7377  | 3458   |       | 50-59     | 959   | 302     |       | 50-59     | 265  | 96     |             |
|  | 55-64         | 16809 | 9162   |       | 60-69     | 2742  | 864     |       | 60-69     | 691  | 244    |             |
|  | 65-74         | 26924 | 17002  |       | 70-79     | 6505  | 2892    |       | 70-79     | 1467 | 708    |             |
|  | 75-84         | 29620 | 24175  |       | 80-89     | 8047  | 6677    |       | 80-89     | 2226 | 2006   |             |
|  | 85+           | 24982 | 37372  |       | 90+       | 2101  | 4511    |       | 90+       | 617  | 1185   |             |
